# Supplementary material for: Variations in Postpartum Hemorrhage Management among Midwives: A National Vignette-Based Study
Source: PLoS One. 2016 Apr 4;11(4):e0152863. doi: 10.1371/journal.pone.0152863 (PMC4820253; doi:10.1371/journal.pone.0152863)
Supplement: S1 Table — (XLS) [file pone.0152863.s003.xls]

## Sheet: Vignette 1
id	crit_1	crit_2	crit_3	crit_4	crit_5	crit_6	crit_7	crit_8	crit_9	crit_10	crit_11	crit_12	crit_13	crit_14	nbok	nberrors	sex	age	code2
1	1	1	1	1	1	1	1	1	1	1	0	1	1	1	13	1	2	40	1
2	1	1	1	1	1	1	1	1	1	1	1	1	1	1	14	0	1	38	1
3	1	1	1	1	1	1	1	1	1	1	1	1	1	1	14	0	2	25	1
4	1	1	0	1	1	1	1	1	1	1	1	1	0	1	12	2	2	35	2
5	1	1	0	1	0	1	1	1	1	1	1	1	1	0	11	3	2	44	2
6	1	1	1	1	1	1	0	1	1	1	0	0	0	1	10	4	2	43	2
7	1	1	1	1	0	1	1	1	1	1	1	1	1	0	12	2	2	35	2
8	1	1	1	1	1	1	0	1	1	1	1	0	0	1	11	3	2	40	3
9	1	0	1	0	1	1	0	1	1	1	1	1	0	0	9	5	1	35	3
10	1	1	1	1	1	1	0	1	1	1	1	1	1	0	12	2	2	34	4
11	1	1	1	1	0	1	1	1	1	1	1	1	1	0	12	2	2	27	5
12	1	0	1	1	0	1	1	1	1	1	0	1	1	0	10	4	2	28	5
13	1	1	1	1	1	0	1	1	1	1	1	1	1	1	13	1	2	29	5
14	0	0	1	1	1	1	1	1	1	1	1	1	1	1	12	2	2	33	5
15	1	1	1	1	0	1	1	1	1	1	1	1	0	0	11	3	2	36	5
16	1	0	1	1	1	1	1	1	1	1	1	1	0	0	11	3	2	33	5
17	1	1	1	1	1	1	1	1	1	1	1	1	1	1	14	0	2	28	5
18	1	1	1	1	1	1	1	1	1	1	1	1	1	1	14	0	2	30	5
19	1	1	1	1	1	1	1	1	1	1	0	1	1	1	13	1	2	42	6
20	1	1	1	1	0	1	0	1	1	1	1	1	0	0	10	4	2	31	6
21	1	1	1	1	1	0	0	1	1	1	1	1	1	1	12	2	2	39	6
22	1	1	1	1	1	1	1	1	1	1	0	1	1	1	13	1	2	38	6
23	1	1	1	1	1	1	0	1	1	1	0	1	1	0	11	3	2	38	7
24	1	1	1	1	1	1	1	1	1	1	1	1	1	1	14	0	2	39	7
25	1	1	1	1	1	1	1	1	1	1	1	1	0	1	13	1	2	56	8
26	1	1	1	1	0	1	0	1	1	1	0	1	1	0	10	4	2	49	8
27	1	1	1	1	1	1	1	1	1	1	1	1	1	1	14	0	2	46	8
28	1	1	0	1	0	1	1	1	1	1	1	1	1	0	11	3	2	38	8
29	1	0	1	1	0	1	0	1	1	1	1	1	1	0	10	4	2	43	8
30	1	0	1	1	1	1	1	1	1	1	0	1	1	1	12	2	2	42	9
31	1	0	1	1	1	1	1	1	1	1	1	1	1	1	13	1	2	43	9
32	1	1	1	1	0	1	1	1	1	1	0	0	1	1	11	3	2	50	9
33	1	0	1	1	1	1	1	1	1	1	1	1	1	1	13	1	2	33	9
34	1	1	1	1	1	1	1	1	1	1	0	1	1	1	13	1	2	40	9
35	1	1	1	1	1	1	1	1	1	0	0	0	1	1	11	3	2	46	10
36	1	0	1	1	1	1	0	1	1	1	1	0	1	0	10	4	2	31	10
37	1	0	1	1	1	1	1	1	1	1	1	1	1	1	13	1	2	33	10
38	1	0	1	1	1	1	1	1	1	1	1	1	0	1	12	2	2	38	10
39	1	1	1	1	1	1	1	1	1	1	1	1	1	1	14	0	2	31	10
40	1	1	1	1	1	1	1	1	1	1	1	1	0	1	13	1	2	28	10
41	1	1	1	1	1	1	1	1	1	1	1	1	1	1	14	0	2	24	10
42	1	0	1	1	1	1	1	1	1	1	1	0	1	1	12	2	2	56	10
43	1	0	1	1	1	0	1	1	1	1	1	0	1	1	11	3	2	27	11
44	1	0	1	1	0	0	1	1	1	1	1	1	1	0	10	4	2	32	11
45	1	0	1	1	0	0	1	1	1	1	1	1	1	0	10	4	2	54	11
46	1	1	1	1	1	1	1	1	1	1	1	1	1	1	14	0	2	31	11
47	1	0	1	1	1	1	1	1	1	1	1	1	1	1	13	1	2	46	11
48	0	1	1	1	1	1	0	0	1	1	0	1	1	1	10	4	2	43	12
49	1	1	1	1	1	1	1	1	1	1	1	1	1	1	14	0	2	28	13
50	1	0	1	1	1	1	1	1	1	1	0	1	0	0	10	4	2	29	13
51	1	1	1	1	1	1	0	1	1	1	0	1	1	1	12	2	2	25	13
52	1	1	1	1	1	1	1	1	1	1	1	1	1	1	14	0	2	34	13
53	1	0	1	1	1	1	1	1	1	1	1	1	0	0	11	3	2	36	13
54	1	1	1	1	1	1	1	1	1	1	1	1	1	1	14	0	2	34	13
55	1	1	1	1	1	1	1	1	1	1	1	1	1	1	14	0	2	27	13
56	1	0	1	1	1	1	0	1	1	1	1	1	0	0	10	4	2	44	13
57	1	1	1	1	1	1	1	1	1	1	0	1	1	1	13	1	2	31	13
58	1	1	1	1	1	1	1	1	1	1	1	0	1	1	13	1	2	40	13
59	1	1	1	1	1	1	1	1	1	1	0	1	1	1	13	1	2	29	13
60	1	1	1	1	1	1	1	1	1	1	0	1	0	0	11	3	2	53	13
61	1	0	1	1	1	1	1	1	1	1	1	1	1	0	12	2	2	30	13
62	1	0	1	1	1	1	0	1	1	1	0	0	0	0	8	6	2	35	13
63	1	0	1	1	1	1	1	1	1	1	1	1	1	1	13	1	1	44	13
64	1	0	1	1	1	1	0	1	1	1	1	1	1	1	12	2	2	25	13
65	1	0	1	1	1	1	1	1	1	1	0	1	0	0	10	4	2	37	13
66	1	1	1	1	0	1	1	1	1	1	0	0	1	1	11	3	2	34	13
67	1	1	1	1	1	1	1	1	1	1	1	1	1	1	14	0	2	37	13
68	1	0	1	1	1	0	0	1	1	1	0	0	0	0	7	7	2	32	13
69	1	0	0	1	1	1	1	1	1	1	1	1	1	0	11	3	2	33	14
70	1	1	1	1	1	1	1	1	1	1	1	1	1	1	14	0	2	31	15
71	1	1	1	1	1	1	1	1	1	1	1	1	1	1	14	0	2	27	15
72	1	1	1	1	1	1	1	1	1	1	0	1	1	1	13	1	2	27	15
73	1	0	1	1	1	1	1	1	1	1	1	1	1	1	13	1	1	40	15
74	1	1	1	1	1	1	1	1	1	1	1	1	0	1	13	1	2	25	15
75	1	1	1	1	1	1	1	1	1	1	1	1	1	1	14	0	2	29	15
76	1	0	1	1	1	1	1	1	1	1	1	1	1	1	13	1	2	30	16
77	1	1	1	1	1	1	1	1	1	1	1	1	1	1	14	0	2	40	17
78	1	1	0	1	1	1	1	1	1	1	1	1	1	1	13	1	2	27	17
79	1	1	1	1	1	1	1	1	1	1	1	1	1	1	14	0	2	40	17
80	1	1	1	1	1	1	1	1	1	1	1	1	1	0	13	1	2	31	17
81	1	1	0	1	0	1	1	1	1	1	1	1	1	0	11	3	2	37	17
82	1	1	1	1	0	1	1	1	1	1	1	1	1	0	12	2	2	23	18
83	1	1	1	1	1	1	1	1	1	1	0	1	1	0	12	2	2	40	18
84	1	1	1	1	1	1	1	1	1	1	1	1	1	1	14	0	2	32	18
85	1	1	1	1	1	1	1	1	1	1	1	1	1	1	14	0	2	40	18
86	1	1	0	1	0	1	1	1	1	1	1	1	1	0	11	3	2	25	18
87	1	0	1	1	1	1	1	1	1	1	1	1	1	1	13	1	2	53	19
88	1	1	1	1	1	1	1	1	1	1	1	1	1	1	14	0	2	30	19
89	1	0	0	1	1	1	1	1	1	1	1	0	1	0	10	4	2	30	19
90	1	0	1	1	1	1	1	1	1	1	1	1	1	1	13	1	2	39	19
91	1	1	1	1	0	1	1	1	1	1	1	1	1	0	12	2	2	39	20
92	1	0	1	1	1	1	1	1	1	1	0	1	1	1	12	2	1	27	20
93	1	0	1	1	1	1	1	1	1	1	1	1	1	1	13	1	2	26	20
94	1	1	1	0	1	1	0	1	1	1	0	1	0	0	9	5	2	28	20
95	0	1	1	1	1	1	1	1	1	1	1	1	0	0	11	3	2	54	20
96	0	0	0	1	0	1	1	1	1	1	1	1	1	1	10	4	2	50	20
97	1	0	1	1	1	1	1	1	1	1	1	1	1	0	12	2	2	41	20
98	0	0	1	1	1	1	1	1	1	1	0	1	1	1	11	3	2	30	20
99	1	1	1	1	1	1	1	1	1	1	0	0	1	0	11	3	2	36	21
100	1	0	1	1	1	1	1	1	1	1	1	1	1	1	13	1	2	29	21
101	1	1	1	1	1	1	1	1	1	1	1	1	1	1	14	0	2	48	21
102	1	1	1	1	1	1	1	1	1	1	1	1	1	0	13	1	2	35	21
103	1	1	1	1	1	1	1	1	1	1	1	1	1	1	14	0	2	28	21
104	1	1	0	1	1	1	1	1	1	1	0	1	0	0	10	4	2	38	21
105	1	1	1	1	1	1	1	1	1	1	1	1	1	1	14	0	2	29	21
106	1	0	1	1	1	1	1	1	1	1	0	0	0	0	9	5	2	33	21
107	1	0	1	1	1	1	1	1	1	1	1	1	0	0	11	3	2	26	21
108	1	0	1	1	1	1	1	1	1	1	1	0	1	1	12	2	2	26	21
109	1	0	1	1	1	1	1	1	1	1	1	1	0	1	12	2	2	45	22
110	1	1	1	1	1	1	1	1	1	1	1	1	1	1	14	0	2	27	22
111	1	1	1	1	1	1	1	1	1	1	1	0	0	0	11	3	2	36	22
112	1	1	1	1	1	1	1	1	1	1	1	1	1	1	14	0	2	35	22
113	1	0	1	0	1	1	1	1	1	1	0	1	1	0	10	4	2	51	22
114	1	0	1	1	1	1	1	1	1	1	0	1	1	1	12	2	2	40	22
115	1	0	1	1	1	1	1	1	1	1	1	1	1	1	13	1	2	37	22
116	1	1	1	1	1	1	1	1	1	1	1	1	1	1	14	0	2	29	23
117	1	1	1	1	1	1	1	1	1	1	1	1	1	1	14	0	2	28	23
118	1	1	1	1	1	1	1	1	1	1	1	1	1	1	14	0	2	27	24
119	1	0	1	1	1	1	1	1	1	1	0	0	1	1	11	3	2	40	24
120	1	1	0	1	1	1	1	1	1	1	1	1	1	0	12	2	1	25	24
121	1	0	1	1	0	1	1	1	1	1	1	1	1	0	11	3	2	38	24
122	1	0	1	1	1	1	1	1	1	1	1	1	1	1	13	1	2	54	24
123	1	0	1	1	1	1	1	1	1	1	1	1	1	1	13	1	2	33	25
124	1	0	1	1	1	1	1	1	1	1	1	0	0	1	11	3	2	32	25
125	1	1	1	1	1	1	1	1	1	1	0	0	1	1	12	2	2	36	25
126	1	1	1	1	1	1	1	1	1	1	1	1	1	1	14	0	2	28	26
127	1	0	1	1	1	1	0	1	1	1	1	0	1	1	11	3	2	38	26
128	1	0	1	1	0	1	1	1	1	1	1	1	1	1	12	2	2	52	26
129	1	0	1	1	0	1	0	1	1	1	1	0	1	0	9	5	2	55	26
130	1	1	1	1	1	1	1	1	1	1	1	1	1	1	14	0	2	37	26
131	1	1	1	1	0	1	1	1	1	1	1	1	1	0	12	2	2	42	26
132	1	1	1	1	1	1	1	1	1	1	0	1	1	1	13	1	2	29	26
133	1	1	1	1	1	1	1	1	1	1	1	1	1	1	14	0	2	37	26
134	1	1	1	1	1	1	1	1	1	1	1	1	1	1	14	0	2	27	26
135	1	1	1	1	1	1	0	1	1	1	1	0	1	1	12	2	2	42	26
136	1	1	1	1	0	1	1	1	1	1	1	1	1	0	12	2	2	31	26
137	1	1	1	1	1	1	1	1	1	1	1	1	1	1	14	0	2	35	26
138	1	1	0	1	0	1	1	1	1	1	1	1	1	0	11	3	2	36	26
139	1	1	1	1	1	1	0	1	1	1	0	0	1	1	11	3	2	32	26
140	1	1	1	1	1	1	1	1	1	1	1	1	1	1	14	0	1	24	27
141	1	0	1	1	0	1	1	0	1	1	1	1	1	0	10	4	2	55	27
142	1	1	1	1	1	1	1	1	1	1	1	1	1	1	14	0	2	26	27
143	1	0	1	1	1	1	0	1	1	1	0	1	0	0	9	5	2	51	27
144	1	1	1	1	1	1	1	0	1	1	1	1	1	1	13	1	2	28	27
145	1	0	1	1	1	1	1	1	1	1	1	1	1	1	13	1	2	25	27
146	1	1	1	1	1	1	1	1	1	1	1	1	1	1	14	0	2	29	28
147	1	1	0	1	1	1	0	1	1	1	1	1	0	0	10	4	1	30	28
148	1	1	1	0	1	1	1	1	1	1	1	1	1	0	12	2	2	28	28
149	1	1	1	1	1	1	0	0	1	1	0	1	1	0	10	4	1	43	28
150	1	1	1	1	1	1	0	1	1	1	1	1	0	1	12	2	2	36	28
151	1	1	1	1	1	1	1	1	1	1	1	1	1	0	13	1	2	33	28
152	1	1	0	1	1	1	0	0	1	1	1	1	0	0	9	5	2	29	28
153	1	1	1	1	1	1	1	1	1	1	1	1	1	1	14	0	2	26	29
154	1	1	1	1	1	1	1	1	1	1	1	0	1	1	13	1	2	29	29
155	1	0	1	1	1	1	1	1	1	1	1	1	1	1	13	1	2	35	29
156	1	1	1	1	1	1	1	1	1	1	1	1	1	1	14	0	2	26	29
157	1	0	1	1	1	1	1	1	1	1	0	1	1	1	12	2	2	54	30
158	1	1	1	1	1	1	1	1	1	1	0	1	1	1	13	1	1	26	30
159	1	1	1	1	1	1	1	1	1	1	1	1	0	0	12	2	2	32	30
160	1	0	1	1	1	1	1	1	1	1	1	1	1	1	13	1	2	36	30
161	1	1	1	1	1	1	1	1	1	1	1	1	1	1	14	0	2	27	30
162	1	1	1	1	0	1	1	1	1	1	0	1	1	1	12	2	2	38	31
163	1	0	1	1	1	1	1	1	1	1	0	0	1	1	11	3	1	57	31
164	1	1	1	1	0	1	1	1	1	1	1	0	1	0	11	3	2	35	32
165	1	0	1	1	1	1	1	1	1	1	1	1	1	1	13	1	2	35	32
166	1	0	1	1	1	1	1	1	1	1	1	1	0	1	12	2	2	41	32
167	1	1	1	1	0	1	1	1	1	1	0	1	1	0	11	3	2	28	32
168	1	1	1	1	1	1	1	1	1	1	1	1	1	1	14	0	2	31	32
169	1	1	1	1	1	1	1	1	1	1	1	1	1	1	14	0	2	26	32
170	1	1	1	1	1	1	1	1	1	1	1	1	1	1	14	0	2	36	32
171	1	1	1	1	1	1	1	1	1	1	1	1	1	1	14	0	2	36	32
172	1	1	0	1	0	1	1	1	1	1	1	1	1	0	11	3	2	26	32
173	1	1	1	1	1	1	1	1	1	1	1	1	1	1	14	0	2	26	32
174	1	0	1	1	0	1	1	1	1	1	1	1	0	0	10	4	2	26	32
175	1	0	1	1	1	1	1	1	1	1	0	1	1	1	12	2	2	46	32
176	1	1	1	1	0	1	1	1	1	1	1	1	1	1	13	1	2	38	32
177	1	1	1	1	0	1	1	1	1	1	1	1	1	0	12	2	2	26	32
178	1	1	1	1	1	1	1	1	1	1	1	1	1	0	13	1	2	25	32
179	1	1	1	1	1	1	1	1	1	1	0	1	1	1	13	1	2	47	33
180	1	1	1	1	1	1	1	1	1	1	1	1	0	0	12	2	2	45	33
181	1	0	1	1	1	1	0	1	1	1	0	1	0	1	10	4	2	29	34
182	1	0	1	1	1	1	1	1	1	1	1	1	1	1	13	1	2	36	34
183	1	0	1	1	1	1	1	1	1	1	0	1	1	1	12	2	2	28	34
184	1	0	1	1	1	1	1	1	1	1	1	1	1	1	13	1	2	33	34
185	1	1	1	1	1	1	1	1	1	1	0	1	1	1	13	1	2	52	34
186	1	1	1	1	1	1	1	1	1	1	1	1	1	1	14	0	2	30	34
187	1	1	1	1	1	1	1	1	1	1	0	1	0	0	11	3	2	34	34
188	1	1	1	1	0	1	1	1	1	1	1	1	1	0	12	2	2	41	34
189	1	1	1	1	1	1	1	1	1	1	0	1	1	1	13	1	2	28	34
190	1	0	1	1	0	1	1	1	1	1	1	1	1	0	11	3	1	35	34
191	1	1	1	1	0	1	1	1	1	1	0	1	1	0	11	3	2	30	35
192	1	1	1	1	0	1	1	1	1	1	1	1	1	0	12	2	2	31	35
193	1	1	0	1	0	1	1	1	1	1	0	1	0	1	10	4	2	31	35
194	1	1	1	1	1	1	1	1	1	1	1	1	0	1	13	1	2	47	35
195	1	1	1	1	1	1	1	1	1	1	1	1	1	0	13	1	1	28	35
196	1	1	1	1	1	1	1	1	1	1	1	1	0	0	12	2	2	35	35
197	1	1	1	1	1	1	1	1	1	1	1	0	1	1	13	1	2	54	36
198	1	0	1	1	1	1	1	1	1	1	1	1	1	1	13	1	2	26	36
199	1	0	1	1	1	1	1	1	1	1	1	1	1	1	13	1	2	25	37
200	0	1	1	1	1	1	1	1	1	1	1	1	1	1	13	1	2	44	37
201	1	1	1	1	1	1	1	1	1	1	0	0	0	0	10	4	2	39	38
202	1	1	1	1	1	1	1	1	1	1	1	1	1	1	14	0	2	38	38
203	1	0	0	1	0	0	1	1	1	0	1	1	1	0	8	6	2	24	38
204	1	1	1	1	1	1	1	1	1	1	1	1	1	1	14	0	2	27	38
205	1	1	1	1	0	1	1	1	1	1	0	1	1	0	11	3	2	51	38
206	1	0	1	1	1	1	1	1	1	1	1	1	1	0	12	2	2	53	39
207	1	1	1	1	1	1	1	1	1	1	1	1	1	1	14	0	2	27	40
208	1	1	0	1	0	1	1	1	1	1	1	1	1	0	11	3	2	32	40
209	1	0	0	1	0	1	0	1	1	1	1	1	1	0	9	5	2	25	40
210	1	1	1	1	1	1	1	1	1	1	1	1	1	1	14	0	2	29	40
211	1	1	1	1	1	1	1	1	1	1	1	1	1	1	14	0	2	30	40
212	1	1	1	1	0	1	1	1	1	1	1	1	1	1	13	1	2	28	40
213	1	1	1	1	0	1	1	1	1	1	1	1	1	0	12	2	2	37	40
214	1	0	1	1	0	1	1	1	1	1	1	1	1	0	11	3	2	31	40
215	1	1	1	1	1	1	1	1	1	1	1	1	1	1	14	0	2	43	41
216	1	1	1	1	1	1	1	1	1	1	1	1	1	1	14	0	2	44	41
217	1	1	1	1	1	1	1	1	1	1	0	1	1	1	13	1	2	25	42
218	1	0	1	1	1	1	1	1	1	1	1	1	1	0	12	2	2	31	42
219	1	0	1	1	1	1	1	0	1	1	0	1	1	1	11	3	2	40	42
220	1	1	1	1	1	1	1	1	1	1	1	1	1	1	14	0	2	27	42
221	1	1	1	1	1	1	0	1	1	1	0	1	1	1	12	2	2	28	42
222	1	0	1	1	1	1	1	1	1	1	1	1	1	1	13	1	2	49	43
223	1	0	1	1	1	1	1	0	1	1	1	1	1	1	12	2	2	46	43
224	1	0	1	1	1	1	1	1	1	1	1	1	1	1	13	1	2	42	43
225	1	1	1	1	1	1	1	1	1	1	0	1	1	1	13	1	2	40	44
226	1	0	1	1	0	1	1	1	1	1	1	1	1	0	11	3	2	45	44
227	1	1	1	1	1	1	1	1	1	1	1	1	0	1	13	1	2	25	44
228	1	0	1	1	1	1	1	1	1	1	1	1	0	0	11	3	2	27	44
229	1	0	1	1	0	1	1	1	1	1	1	1	1	0	11	3	2	28	44
230	1	1	1	1	0	1	1	1	1	1	1	1	1	1	13	1	2	35	44
231	1	0	1	1	1	1	1	1	1	1	1	1	1	1	13	1	2	36	44
232	1	1	1	1	1	1	1	1	1	1	1	1	0	1	13	1	2	53	45
233	1	1	1	1	1	1	1	1	1	1	1	1	1	1	14	0	2	46	45
234	1	0	1	1	1	1	1	1	1	1	1	1	1	1	13	1	2	26	45
235	1	0	1	1	1	1	1	1	1	1	1	1	1	1	13	1	2	28	45
236	1	0	1	1	0	1	1	1	1	1	1	0	1	0	10	4	2	60	45
237	1	1	1	1	1	1	1	1	1	1	1	1	1	1	14	0	2	29	45
238	1	0	1	1	1	1	1	1	1	1	1	1	1	1	13	1	2	34	45
239	1	1	1	1	1	1	1	1	1	1	1	1	1	1	14	0	2	24	46
240	1	1	1	1	1	1	0	1	1	1	1	1	1	1	13	1	2	26	46
241	1	1	1	1	0	1	1	1	1	1	1	1	1	0	12	2	1	28	46
242	1	1	1	1	1	1	1	1	1	1	1	1	1	1	14	0	2	27	46
243	1	1	1	1	0	1	1	1	1	1	1	1	1	0	12	2	2	44	46
244	1	1	1	1	0	1	1	1	1	1	1	1	1	1	13	1	2	43	46
245	1	0	1	1	1	1	1	1	1	1	1	1	1	1	13	1	2	48	46
246	1	0	1	1	1	1	1	1	1	1	1	1	1	1	13	1	2	38	46
247	1	1	1	1	0	1	1	1	1	1	1	1	0	0	11	3	2	33	46
248	1	1	1	1	0	1	1	1	1	1	0	1	1	0	11	3	2	49	47
249	1	0	1	1	1	1	1	1	1	1	1	1	1	1	13	1	2	40	47
250	1	0	1	1	1	1	1	1	1	1	1	1	1	1	13	1	2	44	47
251	1	0	0	1	0	1	1	1	1	1	1	1	0	0	9	5	2	30	47
252	1	0	1	1	1	1	1	1	1	0	1	1	1	1	12	2	2	37	48
253	1	0	1	1	1	1	1	1	1	1	1	1	1	1	13	1	2	49	48
254	1	0	1	1	1	1	1	1	1	1	1	1	0	0	11	3	2	28	48
255	1	0	1	1	1	1	0	1	1	1	1	0	0	0	9	5	2	38	48
256	0	0	1	1	1	1	1	1	1	1	0	1	0	0	9	5	2	35	48
257	1	1	1	1	1	1	1	1	1	1	1	1	1	1	14	0	2	26	48
258	1	0	1	1	0	1	1	1	1	1	0	1	1	0	10	4	1	32	49
259	0	0	1	0	1	1	0	1	1	1	0	0	0	0	6	8	2	36	49
260	1	0	1	1	1	1	1	1	1	1	1	1	1	1	13	1	2	25	50
261	1	0	1	1	0	1	1	1	1	1	0	1	1	0	10	4	2	37	50
262	1	0	1	1	0	1	1	1	1	1	1	1	0	0	10	4	2	49	50
263	1	0	1	1	0	1	1	1	1	1	1	1	0	0	10	4	2	56	50
264	1	1	1	1	0	1	1	1	1	1	1	1	1	0	12	2	2	30	50
265	1	1	1	1	1	1	1	1	1	1	1	1	0	1	13	1	2	27	51
266	1	0	1	1	1	1	1	1	1	1	1	1	0	1	12	2	2	40	51
267	1	1	1	1	1	1	1	1	1	1	1	1	0	0	12	2	2	25	51
268	1	1	1	1	1	1	1	1	1	1	0	0	0	0	10	4	2	42	51
269	1	1	1	1	1	1	1	1	1	1	0	0	1	1	12	2	2	24	51
270	1	0	1	1	0	1	1	1	1	1	1	1	1	0	11	3	2	43	52
271	1	0	1	1	1	1	1	1	1	1	0	1	0	0	10	4	2	25	52
272	1	1	0	1	1	1	1	1	1	1	0	1	0	0	10	4	2	37	53
273	1	1	1	1	1	1	1	1	1	1	1	1	0	0	12	2	2	25	53
274	1	0	0	1	1	1	1	1	1	1	1	1	0	0	10	4	2	25	53
275	1	1	1	1	1	1	1	1	1	1	0	1	0	0	11	3	2	38	54
276	1	1	1	1	1	1	1	1	1	1	1	1	1	1	14	0	2	29	54
277	1	1	1	1	1	1	1	1	1	1	0	0	0	0	10	4	2	39	54
278	1	1	1	1	1	1	0	1	1	1	1	1	1	1	13	1	2	33	54
279	1	1	1	1	1	1	1	1	1	1	1	0	0	0	11	3	2	47	54
280	1	1	1	1	1	1	1	1	1	1	1	1	1	1	14	0	2	41	54
281	1	1	1	1	0	1	1	1	1	1	1	1	1	0	12	2	2	38	54
282	1	1	1	1	1	1	1	1	1	1	1	0	1	0	12	2	2	31	54
283	1	1	1	1	0	1	1	1	1	1	0	1	1	0	11	3	2	38	54
284	1	1	1	1	1	1	1	1	1	1	1	0	0	1	12	2	2	42	54
285	1	1	1	1	1	1	1	1	1	1	1	1	1	1	14	0	2	31	54
286	1	1	1	1	1	1	0	1	1	1	1	1	1	1	13	1	1	26	54
287	1	1	1	1	1	1	1	1	1	1	0	1	0	0	11	3	2	33	55
288	1	1	1	1	1	0	0	1	1	1	0	1	1	1	11	3	2	45	55
289	1	1	1	1	1	1	1	1	1	1	1	1	1	0	13	1	2	41	56
290	1	0	1	1	1	1	1	1	1	1	1	1	0	0	11	3	2	28	56
291	1	1	1	1	1	1	0	1	1	1	1	0	0	1	11	3	2	29	57
292	1	0	1	1	1	1	1	1	1	1	1	1	0	1	12	2	2	30	57
293	1	0	1	1	1	1	1	1	1	1	1	1	0	1	12	2	2	27	57
294	1	0	1	1	1	1	1	1	1	1	0	1	0	0	10	4	2	42	57
295	1	1	1	1	1	0	1	1	1	1	1	1	1	1	13	1	2	31	57
296	1	1	1	1	1	1	1	1	1	1	1	1	1	1	14	0	2	28	57
297	1	1	1	1	1	1	0	1	1	1	1	0	1	1	12	2	2	34	57
298	1	0	1	1	1	1	1	1	1	1	1	0	0	0	10	4	2	36	58
299	1	0	1	1	1	1	0	1	1	1	1	1	0	1	11	3	2	24	58
300	1	1	1	1	1	1	1	1	1	1	1	0	1	0	12	2	2	40	58
301	1	0	1	1	1	1	1	1	1	1	1	1	0	1	12	2	2	27	58
302	1	1	1	1	1	1	1	1	1	1	1	1	1	1	14	0	2	27	58
303	1	1	1	1	1	1	1	1	1	1	1	1	0	0	12	2	1	24	58
304	1	1	1	1	1	0	1	1	1	1	1	0	1	1	12	2	2	38	58
305	1	1	1	1	1	1	1	1	1	1	1	1	1	1	14	0	2	51	59
306	1	0	1	1	1	1	1	1	1	1	0	0	1	1	11	3	2	50	59
307	1	1	1	1	1	1	1	1	1	1	1	1	1	1	14	0	2	54	59
308	1	0	1	1	1	1	1	1	1	1	1	1	1	1	13	1	2	41	60
309	1	1	1	1	1	1	1	1	1	1	1	1	1	1	14	0	2	29	60
310	1	0	1	1	0	1	1	1	1	1	1	1	1	1	12	2	2	29	60
311	1	1	1	1	1	1	1	1	1	1	1	1	1	1	14	0	2	32	61
312	1	1	1	1	1	1	1	1	1	1	1	1	0	1	13	1	2	25	61
313	1	1	1	1	1	1	1	1	1	1	0	0	1	0	11	3	2	29	61
314	1	0	1	1	1	1	0	1	1	1	0	0	0	0	8	6	2	25	61
315	1	1	1	1	1	1	1	1	1	1	1	1	0	1	13	1	2	30	61
316	1	1	1	1	1	1	1	1	1	1	0	0	1	1	12	2	2	28	61
317	1	0	1	1	1	1	0	1	1	1	0	0	0	0	8	6	2	29	61
318	1	0	1	1	1	1	1	1	1	1	0	0	0	0	9	5	2	53	62
319	0	0	1	1	1	1	1	1	1	1	1	1	0	0	10	4	2	47	63
320	1	0	1	1	1	1	1	1	1	1	1	1	0	0	11	3	2	53	63
321	0	0	1	1	1	1	1	1	1	1	1	1	0	0	10	4	2	49	63
322	1	0	1	1	1	1	1	1	1	1	0	1	0	0	10	4	2	48	63
323	1	0	1	1	1	1	0	1	1	1	1	1	0	0	10	4	2	39	63
324	1	1	1	0	1	1	1	1	1	1	1	1	0	0	11	3	2	36	64
325	1	1	1	1	1	1	1	1	1	1	1	1	1	1	14	0	2	26	64
326	1	0	1	1	1	1	1	1	1	1	1	1	0	0	11	3	2	53	64
327	1	1	1	1	0	1	1	1	1	1	1	1	1	0	12	2	2	34	64
328	1	1	1	1	1	1	1	1	1	1	1	1	1	1	14	0	2	36	64
329	1	1	1	1	1	1	1	1	1	1	1	1	1	1	14	0	2	46	65
330	1	1	1	1	1	1	1	1	1	1	1	1	0	1	13	1	2	45	65
331	1	1	1	1	1	1	1	1	1	1	1	1	1	1	14	0	2	26	65
332	1	1	1	1	1	1	1	1	1	1	1	1	1	1	14	0	2	43	65
333	1	0	1	1	1	1	1	1	1	1	1	1	1	1	13	1	2	52	65
334	1	0	1	1	1	0	1	1	1	1	1	1	1	1	12	2	2	27	66
335	1	0	1	1	1	1	0	1	1	1	1	0	0	1	10	4	2	25	66
336	1	1	1	1	1	1	1	1	1	1	0	1	1	1	13	1	2	32	66
337	1	0	1	1	1	1	1	1	1	1	0	1	0	0	10	4	2	51	66
338	1	0	1	1	1	1	1	1	1	1	1	1	0	1	12	2	1	43	67
339	1	1	1	1	1	1	1	1	1	1	1	1	1	1	14	0	2	25	68
340	1	0	1	1	1	1	1	1	1	1	1	0	1	1	12	2	2	35	68
341	1	0	1	1	0	1	1	1	1	1	1	1	1	1	12	2	2	28	68
342	1	1	1	1	1	1	1	1	1	1	1	1	0	1	13	1	2	30	68
343	1	1	1	1	1	1	1	1	1	1	0	1	0	1	12	2	2	55	69
344	1	0	1	1	1	1	1	1	1	1	0	0	0	0	9	5	2	35	70
345	1	0	1	1	1	1	1	1	1	1	1	1	1	1	13	1	2	39	70
346	1	1	1	1	1	1	1	1	1	1	1	1	1	1	14	0	2	45	70
347	1	1	1	1	1	1	1	1	1	1	1	1	0	1	13	1	2	38	70
348	1	0	1	1	1	1	1	1	1	1	1	1	1	1	13	1	2	50	70
349	1	1	1	1	0	1	0	1	1	1	0	1	1	0	10	4	1	27	70
350	1	1	1	1	1	1	1	1	1	1	1	1	1	1	14	0	2	27	70
351	1	1	1	1	1	1	1	1	1	1	0	1	1	1	13	1	2	25	71
352	1	1	1	1	1	1	0	1	1	1	0	1	1	0	11	3	2	38	71
353	1	1	1	1	1	1	1	1	1	1	1	1	1	1	14	0	2	25	71
354	1	1	1	1	1	1	1	1	1	1	0	1	1	1	13	1	2	43	71
355	1	1	1	1	1	1	1	1	1	1	1	1	1	1	14	0	2	42	72
356	1	0	1	1	1	1	1	1	1	1	1	1	1	1	13	1	2	37	72
357	1	0	1	1	1	1	0	1	1	1	0	0	0	0	8	6	1	28	72
358	1	1	1	1	1	1	1	1	1	1	0	1	0	0	11	3	2	48	72
359	1	1	1	1	1	1	1	1	1	1	1	1	0	1	13	1	1	37	72
360	1	1	1	1	1	1	1	1	1	1	1	1	1	1	14	0	2	30	73
361	1	1	1	1	1	1	1	1	1	1	1	1	1	1	14	0	2	35	73
362	1	1	1	1	1	1	1	1	1	1	0	1	1	1	13	1	2	36	73
363	1	1	1	1	1	1	1	1	1	1	1	1	1	1	14	0	2	28	73
364	1	1	1	1	1	1	1	1	1	1	1	1	1	1	14	0	2	25	73
365	1	1	1	1	1	1	1	1	1	1	1	1	1	1	14	0	2	29	73
366	1	1	1	1	1	1	1	1	1	1	1	1	1	0	13	1	2	26	73
367	1	1	1	1	1	1	1	1	1	1	1	1	1	1	14	0	2	44	74
368	1	1	1	1	1	0	1	1	1	1	1	1	1	1	13	1	2	34	74
369	1	0	1	1	0	0	1	1	1	1	0	1	1	0	9	5	2	37	74
370	1	1	1	1	1	1	1	1	1	1	1	1	1	1	14	0	1	27	74
371	1	1	1	1	0	0	1	1	1	1	1	1	1	1	12	2	2	50	74
372	1	1	1	1	1	1	1	1	1	1	1	1	1	1	14	0	2	26	74
373	1	1	1	1	1	1	1	1	1	1	1	1	1	1	14	0	2	30	74
374	1	1	1	1	1	1	1	1	1	1	1	1	1	0	13	1	2	29	75
375	1	1	1	1	1	1	1	1	1	1	1	1	1	1	14	0	2	36	75
376	1	1	1	1	1	1	1	1	1	1	1	1	1	1	14	0	2	31	75
377	1	0	1	1	1	1	1	1	1	1	1	1	1	1	13	1	2	43	75
378	1	1	1	1	1	1	1	1	1	1	1	1	1	1	14	0	2	31	75
379	1	0	1	1	1	1	1	1	1	1	1	1	1	1	13	1	2	31	75
380	1	1	1	1	1	1	1	1	1	1	1	1	1	1	14	0	2	34	75
381	1	0	0	1	1	1	1	1	1	1	1	1	1	0	11	3	2	28	75
382	1	1	1	1	1	1	1	1	1	1	1	1	1	1	14	0	2	33	75
383	1	1	0	1	0	1	1	0	1	1	1	1	1	0	10	4	2	32	76
384	1	1	1	1	1	1	1	1	1	1	1	1	0	1	13	1	2	24	76
385	1	1	1	1	1	1	1	1	1	1	1	1	1	1	14	0	2	45	76
386	1	1	1	1	1	1	1	1	1	1	1	1	1	1	14	0	2	30	76
387	1	1	1	1	1	1	1	1	1	1	1	0	1	1	13	1	2	26	76
388	1	1	1	1	1	1	1	1	1	1	1	1	1	1	14	0	2	24	76
389	1	1	0	1	1	1	0	1	1	1	1	1	0	0	10	4	2	25	76
390	1	1	0	1	1	1	1	1	1	1	1	1	1	1	13	1	2	30	76
391	1	0	1	1	1	1	1	1	1	1	1	1	0	0	11	3	2	30	76
392	1	1	1	1	1	1	1	1	1	1	1	1	1	0	13	1	2	27	76
393	1	1	1	1	1	1	1	1	1	1	1	1	1	1	14	0	2	31	77
394	1	1	1	1	1	1	1	1	1	1	0	1	0	1	12	2	2	54	77
395	1	0	1	1	1	1	1	1	1	1	1	1	1	1	13	1	2	25	78
396	1	1	1	1	1	1	1	1	1	1	1	1	1	1	14	0	2	24	78
397	1	0	0	1	1	1	1	0	1	1	1	1	1	1	11	3	2	28	78
398	1	1	1	1	0	1	1	1	1	1	1	1	1	0	12	2	2	26	78
399	1	1	1	1	0	1	1	1	1	1	1	1	1	1	13	1	2	30	78
400	1	1	0	1	1	1	1	1	1	0	1	1	0	0	10	4	2	26	78
401	1	1	0	1	1	1	1	1	1	1	1	1	1	0	12	2	2	26	78
402	1	1	1	1	1	1	1	1	1	1	0	0	1	1	12	2	2	28	79
403	1	0	1	1	0	1	1	1	1	1	1	1	1	0	11	3	2	28	79
404	1	1	1	1	1	1	1	1	1	1	1	1	1	1	14	0	2	28	79
405	1	1	0	1	1	1	1	1	1	1	1	1	1	1	13	1	2	28	79
406	1	1	1	1	1	1	0	1	1	1	1	1	1	1	13	1	2	27	79
407	1	1	1	1	1	1	1	1	1	1	1	1	1	1	14	0	2	32	79
408	1	1	1	1	1	1	1	1	1	1	1	1	1	1	14	0	2	25	80
409	1	1	1	1	1	1	1	1	1	1	1	1	1	1	14	0	1	28	80
410	1	1	1	1	1	1	1	0	1	1	1	1	1	1	13	1	2	29	80
411	1	1	1	1	1	1	1	1	1	1	1	1	1	0	13	1	2	26	81
412	1	1	1	1	0	1	1	1	1	1	1	1	1	0	12	2	2	27	81
413	1	1	1	1	1	1	1	1	1	1	0	1	1	1	13	1	2	37	81
414	1	0	1	1	1	1	1	1	1	1	1	1	1	1	13	1	2	26	81
415	1	0	1	1	1	1	1	1	1	1	1	0	1	1	12	2	2	36	82
416	1	1	1	1	1	1	1	1	1	1	1	1	1	1	14	0	2	26	82
417	1	1	1	1	1	1	1	1	1	1	1	1	1	1	14	0	2	51	82
418	1	1	1	1	0	1	1	1	1	1	1	1	1	0	12	2	2	35	83
419	1	1	1	1	0	1	1	1	1	1	1	1	1	0	12	2	2	40	83
420	1	1	1	1	1	1	1	1	1	1	1	0	1	1	13	1	2	41	83
421	1	1	1	1	0	1	1	1	1	1	1	1	1	0	12	2	2	34	83
422	1	1	1	1	1	1	1	1	1	1	1	1	1	1	14	0	2	30	83
423	1	1	1	1	0	1	1	1	1	1	0	1	1	0	11	3	1	40	83
424	1	1	1	1	1	1	1	1	1	0	0	1	1	0	11	3	2	32	84
425	1	1	1	1	1	1	1	1	1	1	1	0	1	0	12	2	2	44	84
426	1	0	1	1	1	1	1	1	1	1	1	1	1	1	13	1	2	29	84
427	1	1	1	1	1	1	1	1	1	1	1	1	1	1	14	0	2	36	84
428	1	0	1	1	1	1	1	1	1	1	1	1	1	1	13	1	2	32	84
429	1	1	1	1	1	1	1	1	1	1	1	1	1	0	13	1	2	32	84
430	1	1	1	1	1	1	1	1	1	1	1	1	1	1	14	0	2	25	84
431	1	1	1	1	1	1	1	1	1	1	1	1	1	1	14	0	2	26	84
432	1	1	1	1	1	1	1	1	1	1	1	1	1	1	14	0	2	28	85
433	1	0	1	1	0	1	1	1	1	1	1	1	1	0	11	3	2	30	85
434	1	0	1	1	1	1	1	1	1	1	1	1	1	1	13	1	2	28	85
435	1	1	1	1	0	1	1	1	1	1	1	1	1	0	12	2	2	32	85
436	1	0	1	1	0	1	1	1	1	1	1	1	1	1	12	2	2	33	85
437	1	1	1	1	0	1	1	1	1	1	1	1	1	0	12	2	2	27	85
438	1	1	1	1	1	1	1	1	1	1	1	1	1	1	14	0	2	28	86
439	1	0	1	1	1	1	1	1	1	1	0	1	1	1	12	2	2	33	86
440	1	0	1	1	1	1	1	1	1	1	1	1	1	1	13	1	2	56	86
441	1	0	1	1	0	1	1	1	1	1	1	1	1	0	11	3	2	27	87
442	1	1	1	1	1	1	1	1	1	1	1	1	1	0	13	1	2	30	87
443	1	1	0	1	1	1	1	1	1	1	1	1	0	0	11	3	2	26	87
444	1	0	1	1	0	1	1	1	1	1	1	1	1	0	11	3	2	26	87
445	1	1	1	1	1	1	1	1	1	1	1	1	1	1	14	0	2	25	87
446	1	0	1	1	1	1	1	1	1	1	1	1	1	1	13	1	1	27	87
447	1	1	1	1	1	1	1	1	1	1	1	1	1	1	14	0	2	36	87
448	1	1	1	1	1	1	1	1	1	1	1	1	1	1	14	0	2	26	87
449	1	0	1	1	1	1	1	1	1	1	1	1	1	1	13	1	2	27	87
450	1	1	0	1	0	1	1	1	1	1	1	1	1	0	11	3	2	31	87

## Sheet: Vignette 2
id	crit_1	crit_2	crit_3	crit_4	crit_5	crit_6	crit_7	crit_8	crit_9	crit_10	crit_11	crit_12	crit_13	crit_14	nbok	nberrors	sex	age	code2
1	1	0	1	1	1	1	1	1	1	1	0	0	1	1	11	3	2	40	1
2	1	0	1	1	1	0	1	1	1	1	1	0	0	0	9	5	1	38	1
3	1	1	1	0	1	0	1	1	1	1	1	1	0	1	11	3	2	25	1
4	1	0	1	1	1	1	1	1	1	1	1	0	0	1	11	3	2	35	2
5	1	1	1	0	1	1	1	1	1	1	1	0	0	1	11	3	2	44	2
6	1	0	1	0	1	0	1	1	0	1	0	0	0	1	7	7	2	43	2
7	1	0	1	1	1	0	1	1	1	1	0	0	1	1	10	4	2	35	2
8	1	0	1	0	1	1	0	1	1	1	0	0	0	0	7	7	2	40	3
9	1	0	1	0	1	1	0	1	1	1	1	1	0	0	9	5	1	35	3
10	1	0	1	0	1	1	0	1	1	1	0	0	0	0	7	7	2	34	4
11	1	0	1	1	1	0	1	1	1	1	0	0	1	1	10	4	2	27	5
12	1	1	1	1	1	0	1	1	1	1	0	0	0	0	9	5	2	28	5
13	1	1	1	1	1	1	1	1	1	1	0	0	0	0	10	4	2	29	5
14	1	0	1	1	1	1	1	1	1	1	0	1	0	0	10	4	2	33	5
15	1	1	1	1	0	1	1	1	1	1	1	1	1	0	12	2	2	36	5
16	1	1	1	0	1	0	1	1	1	1	0	0	0	0	8	6	2	33	5
17	1	1	1	1	1	1	1	1	1	1	1	1	1	1	14	0	2	28	5
18	1	0	1	1	1	1	1	1	1	1	0	0	0	0	9	5	2	30	5
19	1	0	1	1	1	0	1	1	1	0	0	0	0	0	7	7	2	42	6
20	1	1	1	0	1	1	1	1	1	1	0	0	0	1	10	4	2	31	6
21	1	0	1	1	1	1	1	1	1	0	0	0	0	0	8	6	2	39	6
22	1	0	1	1	0	0	1	1	1	1	0	1	1	0	9	5	2	38	6
23	1	1	1	0	1	1	1	1	1	1	0	0	0	0	9	5	2	38	7
24	1	1	1	1	1	1	0	1	1	1	0	0	1	0	10	4	2	39	7
25	1	1	1	1	1	1	1	1	1	1	1	1	0	0	12	2	2	56	8
26	1	0	1	0	1	1	1	1	1	1	0	0	0	1	9	5	2	49	8
27	1	1	1	1	1	1	1	1	1	1	0	0	0	1	11	3	2	46	8
28	1	1	1	1	0	1	1	1	1	1	1	1	1	0	12	2	2	38	8
29	1	0	1	1	1	0	1	1	1	1	0	1	0	1	10	4	2	43	8
30	1	0	1	1	1	1	1	1	1	1	1	1	1	1	13	1	2	42	9
31	1	1	1	0	1	0	1	1	1	1	0	0	0	1	9	5	2	43	9
32	1	0	1	0	1	0	1	1	1	1	0	0	1	0	8	6	2	50	9
33	1	0	1	1	1	1	1	1	1	1	0	1	0	1	11	3	2	33	9
34	1	1	1	0	1	0	1	1	1	1	0	0	0	1	9	5	2	40	9
35	1	1	1	1	0	1	1	1	1	1	0	1	1	0	11	3	2	46	10
36	1	0	1	0	1	1	1	1	1	1	0	0	1	1	10	4	2	31	10
37	1	0	1	1	1	1	1	1	1	1	0	1	1	1	12	2	2	33	10
38	1	0	1	1	1	1	1	1	1	1	1	0	1	1	12	2	2	38	10
39	1	1	1	1	1	0	1	1	1	1	0	1	1	1	12	2	2	31	10
40	1	0	1	1	1	1	1	1	1	1	1	1	0	1	12	2	2	28	10
41	1	0	1	0	1	1	1	1	1	1	0	0	0	1	9	5	2	24	10
42	1	0	1	1	1	1	1	1	1	1	1	1	1	1	13	1	2	56	10
43	1	0	1	1	1	0	1	1	1	1	1	0	1	1	11	3	2	27	11
44	1	0	1	1	1	1	1	1	1	1	1	1	1	1	13	1	2	32	11
45	1	0	1	1	1	1	1	1	1	0	1	1	0	1	11	3	2	54	11
46	1	1	1	1	1	0	1	1	1	0	1	0	1	0	10	4	2	31	11
47	1	0	1	0	1	1	1	1	1	1	1	0	0	0	9	5	2	46	11
48	1	0	1	0	1	0	1	1	1	0	0	0	0	1	7	7	2	43	12
49	1	1	1	1	1	1	1	1	1	1	1	1	1	1	14	0	2	28	13
50	1	0	1	0	1	1	0	1	1	1	0	0	0	0	7	7	2	29	13
51	1	1	1	1	1	1	1	1	1	1	1	1	0	1	13	1	2	25	13
52	1	1	1	1	1	1	1	1	1	0	0	0	0	0	9	5	2	34	13
53	1	1	1	1	1	1	1	1	1	1	0	0	0	1	11	3	2	36	13
54	1	0	1	1	1	1	1	1	1	0	0	1	0	1	10	4	2	34	13
55	1	1	1	1	1	1	1	1	1	1	1	1	0	0	12	2	2	27	13
56	1	0	1	1	1	0	1	1	1	1	0	1	1	1	11	3	2	44	13
57	1	0	1	1	1	1	1	1	1	1	0	1	1	1	12	2	2	31	13
58	1	0	1	0	1	0	1	1	1	1	0	1	0	1	9	5	2	40	13
59	1	1	1	0	1	1	1	1	1	1	0	1	0	1	11	3	2	29	13
60	1	0	1	0	1	1	0	1	1	0	0	0	0	0	6	8	2	53	13
61	1	1	1	0	1	0	1	1	1	1	0	0	0	0	8	6	2	30	13
62	1	1	1	1	1	0	1	1	1	1	0	1	1	1	12	2	2	35	13
63	1	0	1	1	1	0	1	1	1	1	1	1	0	1	11	3	1	44	13
64	1	0	0	1	0	0	1	1	1	1	0	1	0	0	7	7	2	25	13
65	1	0	1	1	1	0	0	1	1	1	0	0	1	0	8	6	2	37	13
66	1	0	1	0	1	0	1	1	1	1	0	0	0	1	8	6	2	34	13
67	1	1	1	0	1	1	1	1	1	1	1	0	0	1	11	3	2	37	13
68	1	0	1	0	1	1	1	1	1	1	0	0	0	0	8	6	2	32	13
69	1	0	1	0	1	1	1	1	1	1	1	1	1	1	12	2	2	33	14
70	1	0	1	1	1	1	1	1	1	1	0	1	0	0	10	4	2	31	15
71	1	1	1	1	1	1	1	1	1	1	1	1	1	1	14	0	2	27	15
72	1	1	1	1	1	0	1	1	1	0	1	1	1	1	12	2	2	27	15
73	1	0	1	1	1	0	1	1	1	1	1	1	1	1	12	2	1	40	15
74	1	1	1	1	1	0	1	1	1	1	0	1	0	1	11	3	2	25	15
75	1	1	1	1	1	1	0	1	1	1	0	1	0	0	10	4	2	29	15
76	1	1	1	1	1	1	1	1	1	0	1	1	1	1	13	1	2	30	16
77	1	0	1	1	1	1	1	1	1	1	1	1	1	1	13	1	2	40	17
78	1	1	1	1	1	1	1	1	1	1	0	1	1	1	13	1	2	27	17
79	1	1	1	1	1	1	1	1	1	1	0	1	1	1	13	1	2	40	17
80	1	1	1	1	1	1	1	1	1	1	1	1	1	0	13	1	2	31	17
81	1	1	1	1	1	1	1	1	1	1	1	1	1	1	14	0	2	37	17
82	1	1	1	1	1	1	1	1	1	1	1	0	0	1	12	2	2	23	18
83	1	1	1	0	1	1	0	1	1	0	0	0	0	0	7	7	2	40	18
84	1	1	1	1	1	1	1	1	1	1	1	0	1	1	13	1	2	32	18
85	1	0	1	0	1	1	1	1	1	1	0	0	0	1	9	5	2	40	18
86	1	0	1	0	0	1	1	1	1	1	1	1	0	0	9	5	2	25	18
87	1	0	1	1	1	1	1	1	1	1	0	0	0	0	9	5	2	53	19
88	1	0	1	1	1	1	1	1	1	1	1	1	0	0	11	3	2	30	19
89	1	1	1	1	1	1	1	1	1	1	1	1	1	1	14	0	2	30	19
90	1	0	1	1	1	0	1	1	1	1	0	1	1	1	11	3	2	39	19
91	1	0	1	1	0	1	1	1	1	1	1	1	0	0	10	4	2	39	20
92	1	0	1	0	1	1	1	1	1	1	1	1	1	1	12	2	1	27	20
93	1	0	1	1	1	0	1	1	1	1	0	1	0	0	9	5	2	26	20
94	0	0	1	0	1	0	0	1	1	1	0	0	0	0	5	9	2	28	20
95	1	0	1	1	1	0	1	1	1	1	0	0	0	0	8	6	2	54	20
96	0	0	1	1	1	1	1	1	1	1	0	1	0	1	10	4	2	50	20
97	0	0	1	0	1	1	1	1	1	1	0	0	0	0	7	7	2	41	20
98	1	0	0	1	1	0	1	1	1	1	0	1	0	0	8	6	2	30	20
99	1	1	1	1	1	1	1	1	1	1	0	0	0	0	10	4	2	36	21
100	1	0	1	1	1	0	1	1	1	1	1	1	1	1	12	2	2	29	21
101	1	1	1	1	1	1	1	1	1	1	1	1	0	0	12	2	2	48	21
102	1	0	1	1	1	1	1	1	1	1	1	1	0	0	11	3	2	35	21
103	1	1	1	1	1	1	1	1	1	1	0	1	1	1	13	1	2	28	21
104	1	1	0	1	1	1	1	1	1	1	0	1	0	0	10	4	2	38	21
105	1	1	1	1	1	1	1	1	1	1	0	1	0	0	11	3	2	29	21
106	1	1	1	1	1	0	0	1	1	1	1	0	1	0	10	4	2	33	21
107	1	1	1	0	1	0	0	1	1	1	0	0	0	0	7	7	2	26	21
108	1	0	1	1	1	1	1	1	1	1	0	1	0	0	10	4	2	26	21
109	1	1	1	1	1	1	1	1	1	1	0	0	0	0	10	4	2	45	22
110	1	1	1	1	1	1	1	1	1	1	1	1	1	1	14	0	2	27	22
111	1	0	1	0	1	1	1	1	1	1	0	0	0	0	8	6	2	36	22
112	1	0	1	1	1	1	1	1	1	1	1	0	0	1	11	3	2	35	22
113	1	0	1	0	1	0	1	1	1	1	0	0	0	0	7	7	2	51	22
114	1	1	1	1	1	1	1	1	1	1	1	1	1	1	14	0	2	40	22
115	1	1	1	0	1	1	1	1	1	1	0	1	0	0	10	4	2	37	22
116	1	0	1	1	1	1	1	1	1	1	1	1	1	1	13	1	2	29	23
117	1	0	1	1	1	1	1	1	1	1	0	0	0	0	9	5	2	28	23
118	1	0	1	0	1	0	1	1	1	1	1	0	0	0	8	6	2	27	24
119	1	0	1	0	1	0	1	1	1	1	0	0	0	0	7	7	2	40	24
120	1	0	1	1	1	1	1	1	1	1	1	1	1	1	13	1	1	25	24
121	1	1	1	1	1	0	1	1	1	1	0	0	0	1	10	4	2	38	24
122	1	1	1	1	1	1	1	1	1	1	1	1	1	1	14	0	2	54	24
123	1	1	1	0	1	0	1	1	1	1	1	1	0	0	10	4	2	33	25
124	1	1	1	1	1	0	1	1	1	1	0	0	1	0	10	4	2	32	25
125	1	1	1	1	1	1	1	1	1	1	0	0	1	1	12	2	2	36	25
126	1	1	1	1	1	1	1	1	1	1	1	1	0	1	13	1	2	28	26
127	1	0	1	0	1	1	1	1	1	1	0	0	0	1	9	5	2	38	26
128	1	0	1	1	0	1	1	1	1	1	1	1	1	1	12	2	2	52	26
129	1	0	1	0	1	1	0	1	1	1	1	0	0	0	8	6	2	55	26
130	1	0	1	1	1	1	1	1	1	1	0	0	1	1	11	3	2	37	26
131	1	1	1	1	0	1	0	1	1	1	1	1	1	0	11	3	2	42	26
132	1	1	1	0	1	1	0	1	1	1	0	1	1	1	11	3	2	29	26
133	1	0	1	1	1	1	1	1	1	1	1	0	0	0	10	4	2	37	26
134	1	1	1	1	1	1	1	1	1	1	0	1	1	1	13	1	2	27	26
135	1	1	1	1	1	1	1	1	1	1	0	0	0	1	11	3	2	42	26
136	1	0	1	1	0	1	1	0	1	1	1	1	1	0	10	4	2	31	26
137	1	0	1	0	1	0	1	1	1	1	0	0	0	1	8	6	2	35	26
138	1	0	1	1	1	1	1	1	1	1	1	1	0	1	12	2	2	36	26
139	1	1	1	0	1	1	0	1	1	1	0	0	0	0	8	6	2	32	26
140	1	1	1	0	1	1	1	1	1	0	1	1	1	1	12	2	1	24	27
141	1	0	1	1	1	0	1	1	1	1	1	1	0	1	11	3	2	55	27
142	1	1	1	1	1	1	1	1	1	1	1	1	1	1	14	0	2	26	27
143	1	0	1	1	1	0	1	1	1	1	1	1	0	1	11	3	2	51	27
144	1	1	1	0	1	0	1	1	1	1	1	1	0	1	11	3	2	28	27
145	1	1	1	1	1	1	1	1	1	1	1	1	0	1	13	1	2	25	27
146	1	0	1	1	1	1	1	1	1	1	1	1	1	1	13	1	2	29	28
147	1	1	1	1	0	1	1	1	1	1	1	1	1	1	13	1	1	30	28
148	1	0	1	1	1	1	1	1	1	1	1	1	1	0	12	2	2	28	28
149	1	0	1	1	1	0	1	0	1	0	1	0	0	0	7	7	1	43	28
150	1	0	1	0	1	0	1	1	1	0	0	0	0	1	7	7	2	36	28
151	1	0	1	0	1	1	1	1	1	1	1	1	0	0	10	4	2	33	28
152	1	1	1	1	0	1	1	0	1	1	1	0	1	0	10	4	2	29	28
153	1	0	1	0	1	0	1	1	1	1	1	0	0	1	9	5	2	26	29
154	1	1	1	0	1	0	1	1	1	1	1	0	0	1	10	4	2	29	29
155	1	1	1	1	1	1	1	1	1	1	0	1	0	1	12	2	2	35	29
156	1	0	1	0	1	1	1	1	1	1	0	1	0	0	9	5	2	26	29
157	1	0	1	0	1	0	1	1	1	1	1	0	0	0	8	6	2	54	30
158	1	0	1	1	1	0	1	1	1	1	0	0	0	0	8	6	1	26	30
159	1	1	1	0	1	1	1	1	1	0	0	0	0	1	9	5	2	32	30
160	1	0	1	0	1	0	0	1	1	1	1	0	1	1	9	5	2	36	30
161	1	1	1	1	1	0	1	1	1	1	1	0	1	1	12	2	2	27	30
162	1	1	0	1	0	1	1	1	1	1	0	1	1	1	11	3	2	38	31
163	1	0	1	0	1	0	1	1	1	1	0	1	0	0	8	6	1	57	31
164	1	0	1	1	0	1	1	1	1	1	1	1	0	0	10	4	2	35	32
165	1	1	1	0	1	1	1	1	1	1	0	0	0	0	9	5	2	35	32
166	1	1	1	0	1	0	1	1	1	1	0	0	1	1	10	4	2	41	32
167	1	1	1	1	0	1	1	1	1	1	1	1	0	0	11	3	2	28	32
168	1	0	1	1	1	1	1	1	1	1	0	0	0	0	9	5	2	31	32
169	1	0	1	1	0	1	1	1	1	1	1	1	1	0	11	3	2	26	32
170	1	1	1	1	0	1	1	1	1	1	1	1	1	0	12	2	2	36	32
171	1	0	1	1	1	1	1	1	1	1	1	1	0	1	12	2	2	36	32
172	1	0	1	1	1	1	1	1	1	1	1	1	0	1	12	2	2	26	32
173	1	1	1	1	1	1	1	1	1	1	0	1	1	1	13	1	2	26	32
174	1	0	1	1	1	0	1	1	1	1	0	0	0	1	9	5	2	26	32
175	1	0	1	0	1	1	1	1	1	1	0	0	0	1	9	5	2	46	32
176	1	0	1	0	1	0	1	1	1	1	1	1	0	1	10	4	2	38	32
177	1	0	1	1	1	1	1	1	1	1	1	1	0	1	12	2	2	26	32
178	1	0	1	1	1	1	0	1	1	1	0	0	0	0	8	6	2	25	32
179	1	1	1	1	1	0	1	1	1	1	0	1	0	0	10	4	2	47	33
180	1	0	1	1	1	1	1	1	1	1	0	0	0	0	9	5	2	45	33
181	1	0	1	1	0	1	1	1	1	1	0	1	0	0	9	5	2	29	34
182	1	0	1	0	1	1	1	1	1	1	0	0	0	1	9	5	2	36	34
183	1	0	1	1	1	1	0	1	1	1	0	0	0	0	8	6	2	28	34
184	1	0	1	1	1	1	1	1	1	1	1	1	1	1	13	1	2	33	34
185	1	0	1	0	1	1	0	1	1	1	0	0	1	0	8	6	2	52	34
186	1	0	1	0	1	1	1	1	1	1	1	0	1	0	10	4	2	30	34
187	1	1	1	1	1	1	1	1	1	1	0	1	0	1	12	2	2	34	34
188	1	0	1	1	0	1	1	1	1	1	1	1	1	0	11	3	2	41	34
189	1	1	1	1	1	1	1	1	1	1	0	1	1	1	13	1	2	28	34
190	1	0	1	1	1	0	1	1	1	1	0	0	0	1	9	5	1	35	34
191	1	1	1	1	1	1	1	1	1	1	0	1	1	1	13	1	2	30	35
192	1	1	1	1	1	1	1	1	1	1	0	0	1	1	12	2	2	31	35
193	1	0	1	1	1	1	1	1	1	1	0	0	0	1	10	4	2	31	35
194	1	0	1	1	1	1	1	1	1	1	0	0	0	1	10	4	2	47	35
195	1	1	1	1	1	1	1	1	1	1	1	1	0	0	12	2	1	28	35
196	1	0	1	1	1	1	1	1	1	1	1	0	0	1	11	3	2	35	35
197	1	0	1	1	1	1	1	1	1	1	1	1	1	1	13	1	2	54	36
198	1	0	1	1	1	1	1	1	1	1	0	1	1	1	12	2	2	26	36
199	1	0	1	0	1	1	1	1	1	0	0	0	0	0	7	7	2	25	37
200	1	1	1	1	1	1	1	1	1	1	1	0	1	1	13	1	2	44	37
201	1	0	1	0	1	0	1	1	1	1	0	0	0	0	7	7	2	39	38
202	1	1	1	1	1	1	1	1	1	0	1	1	1	1	13	1	2	38	38
203	1	0	1	0	1	1	0	1	1	0	1	1	1	1	10	4	2	24	38
204	1	1	1	1	1	1	1	1	1	1	1	1	1	1	14	0	2	27	38
205	0	1	1	0	1	1	1	1	1	1	0	0	0	0	8	6	2	51	38
206	1	0	1	1	1	0	1	1	1	1	1	1	1	0	11	3	2	53	39
207	1	0	1	1	1	1	1	1	1	1	1	1	1	1	13	1	2	27	40
208	1	1	1	1	0	1	1	1	1	1	1	1	1	0	12	2	2	32	40
209	1	0	1	1	1	1	0	1	1	1	1	1	1	1	12	2	2	25	40
210	1	0	1	1	1	1	1	1	1	1	1	0	0	1	11	3	2	29	40
211	1	0	1	1	1	0	1	1	1	1	1	1	1	1	12	2	2	30	40
212	1	0	1	1	1	1	1	1	1	1	1	1	1	1	13	1	2	28	40
213	1	0	1	1	0	1	1	1	1	1	1	1	0	0	10	4	2	37	40
214	1	0	1	1	1	1	1	1	1	1	1	1	1	0	12	2	2	31	40
215	1	1	1	1	1	1	1	1	1	1	1	1	1	1	14	0	2	43	41
216	1	0	1	0	1	0	1	1	1	0	0	0	0	0	6	8	2	44	41
217	1	1	1	1	1	0	1	1	1	1	0	1	1	1	12	2	2	25	42
218	1	0	1	1	1	1	1	1	1	1	1	1	0	0	11	3	2	31	42
219	1	0	1	0	1	1	1	1	1	1	1	1	1	1	12	2	2	40	42
220	1	1	1	1	1	1	1	1	1	1	1	1	1	1	14	0	2	27	42
221	1	0	1	1	1	1	1	1	1	1	0	1	1	1	12	2	2	28	42
222	1	0	1	0	1	1	1	1	1	1	1	1	0	1	11	3	2	49	43
223	1	0	1	1	1	1	1	1	1	1	0	0	1	1	11	3	2	46	43
224	1	0	1	1	1	0	1	1	1	1	1	1	0	1	11	3	2	42	43
225	1	0	1	1	0	1	1	1	1	1	1	1	1	1	12	2	2	40	44
226	1	0	1	1	1	1	1	1	1	1	1	0	1	1	12	2	2	45	44
227	1	1	1	1	1	1	1	1	1	1	1	1	0	1	13	1	2	25	44
228	1	0	1	1	1	1	1	1	1	0	1	1	0	0	10	4	2	27	44
229	1	0	1	0	1	1	1	1	1	1	0	1	0	1	10	4	2	28	44
230	0	1	1	1	1	1	1	1	1	1	1	1	0	1	12	2	2	35	44
231	1	0	1	1	0	1	1	1	1	1	1	1	0	0	10	4	2	36	44
232	1	0	1	1	1	1	1	1	1	1	1	1	1	1	13	1	2	53	45
233	1	0	1	0	1	0	0	1	1	0	0	0	1	0	6	8	2	46	45
234	1	0	1	1	1	1	0	1	1	0	1	0	1	1	10	4	2	26	45
235	1	0	1	1	1	1	1	1	1	1	1	1	1	1	13	1	2	28	45
236	1	0	1	0	1	0	1	1	1	1	1	0	0	1	9	5	2	60	45
237	1	0	1	1	1	1	0	1	1	1	1	1	0	1	11	3	2	29	45
238	1	0	1	1	1	1	1	1	1	0	0	0	1	0	9	5	2	34	45
239	1	1	1	1	1	1	1	1	1	1	0	1	0	1	12	2	2	24	46
240	1	1	1	1	1	1	1	1	1	1	1	1	0	1	13	1	2	26	46
241	1	1	1	0	1	1	1	1	1	1	0	0	0	1	10	4	1	28	46
242	1	0	1	1	1	0	1	1	1	1	1	1	1	1	12	2	2	27	46
243	1	1	1	1	0	1	1	1	1	1	1	1	1	0	12	2	2	44	46
244	1	1	1	1	1	1	1	1	1	1	1	0	1	1	13	1	2	43	46
245	1	0	1	1	1	0	1	1	1	1	0	0	1	1	10	4	2	48	46
246	1	0	1	1	1	1	0	1	1	1	1	1	1	1	12	2	2	38	46
247	1	0	1	1	1	0	1	1	1	1	0	0	0	1	9	5	2	33	46
248	1	1	1	0	1	1	1	1	1	1	0	0	0	1	10	4	2	49	47
249	1	0	1	1	1	1	1	1	1	1	1	1	0	0	11	3	2	40	47
250	1	0	1	1	1	0	1	1	1	1	1	0	1	1	11	3	2	44	47
251	1	0	1	1	0	1	1	1	1	1	1	1	1	0	11	3	2	30	47
252	1	0	1	1	1	0	1	1	1	1	1	0	0	1	10	4	2	37	48
253	0	0	1	1	1	1	1	1	1	1	0	0	0	0	8	6	2	49	48
254	0	0	1	0	1	1	1	1	1	0	0	1	0	0	7	7	2	28	48
255	0	1	1	0	1	0	1	1	1	1	0	0	0	0	7	7	2	38	48
256	0	0	1	1	1	1	0	1	1	1	0	0	0	0	7	7	2	35	48
257	1	1	1	1	1	1	1	1	1	1	1	1	0	0	12	2	2	26	48
258	1	1	1	0	1	1	1	1	1	1	0	1	1	1	12	2	1	32	49
259	0	0	1	0	1	1	0	1	1	1	0	0	0	0	6	8	2	36	49
260	1	0	1	1	1	0	1	0	1	1	1	1	1	1	11	3	2	25	50
261	1	0	1	1	1	0	1	1	1	1	0	1	1	1	11	3	2	37	50
262	1	0	1	1	1	0	1	1	1	1	1	1	1	1	12	2	2	49	50
263	1	1	1	1	0	1	1	1	1	1	1	1	1	1	13	1	2	56	50
264	1	1	1	1	0	1	1	1	1	1	1	1	1	0	12	2	2	30	50
265	1	1	1	1	1	0	1	1	1	1	1	1	0	1	12	2	2	27	51
266	1	0	1	1	1	1	1	1	1	1	0	0	0	0	9	5	2	40	51
267	1	1	1	1	1	1	0	1	1	1	0	1	0	0	10	4	2	25	51
268	1	1	1	0	1	1	1	1	1	1	0	0	0	1	10	4	2	42	51
269	1	1	1	1	1	0	1	1	1	1	1	1	1	1	13	1	2	24	51
270	1	0	1	1	1	0	1	1	1	1	1	1	0	0	10	4	2	43	52
271	1	0	1	1	1	0	1	1	1	1	0	1	0	0	9	5	2	25	52
272	1	1	1	1	0	1	1	1	1	1	0	1	0	0	10	4	2	37	53
273	1	0	1	1	1	1	1	1	1	1	1	1	0	0	11	3	2	25	53
274	1	0	1	1	1	1	1	1	1	1	1	1	0	1	12	2	2	25	53
275	1	1	1	1	1	0	1	1	1	1	0	0	0	0	9	5	2	38	54
276	1	1	1	1	1	1	1	1	1	1	0	1	0	1	12	2	2	29	54
277	1	1	1	1	1	1	1	1	1	1	0	0	0	0	10	4	2	39	54
278	1	0	1	1	1	0	1	1	1	1	0	0	0	0	8	6	2	33	54
279	1	0	1	1	1	0	0	1	1	1	1	0	1	0	9	5	2	47	54
280	1	1	1	1	1	0	1	1	1	1	0	0	0	1	10	4	2	41	54
281	1	1	1	1	1	1	1	1	1	1	0	1	1	1	13	1	2	38	54
282	1	0	1	1	1	0	1	1	1	1	0	0	0	1	9	5	2	31	54
283	1	0	1	1	1	0	1	1	1	1	0	0	1	1	10	4	2	38	54
284	1	1	1	1	1	1	1	1	1	1	1	1	0	1	13	1	2	42	54
285	1	1	1	1	1	0	1	1	1	1	1	0	0	0	10	4	2	31	54
286	1	1	1	1	1	0	1	1	1	1	1	1	1	1	13	1	1	26	54
287	1	0	1	0	1	1	1	1	1	0	0	0	0	0	7	7	2	33	55
288	1	1	1	1	1	0	0	1	1	1	1	1	1	1	12	2	2	45	55
289	1	0	1	0	1	0	1	1	1	1	1	1	0	0	9	5	2	41	56
290	1	0	1	1	1	1	1	1	1	1	0	1	0	1	11	3	2	28	56
291	1	1	1	1	1	1	1	1	1	1	1	1	0	1	13	1	2	29	57
292	1	1	1	1	1	1	1	1	1	1	1	1	0	1	13	1	2	30	57
293	1	0	1	1	0	1	1	1	1	1	1	0	1	1	11	3	2	27	57
294	1	0	1	0	1	1	0	1	1	1	0	0	0	0	7	7	2	42	57
295	1	1	1	1	1	1	1	1	1	1	1	1	1	1	14	0	2	31	57
296	1	1	1	1	0	0	1	1	1	1	1	1	1	1	12	2	2	28	57
297	1	1	1	0	1	1	1	1	1	1	1	0	0	0	10	4	2	34	57
298	1	0	1	1	1	1	0	1	1	1	1	0	0	0	9	5	2	36	58
299	1	1	1	1	1	1	1	1	1	1	1	1	0	1	13	1	2	24	58
300	1	0	1	1	1	0	0	1	1	1	1	0	1	0	9	5	2	40	58
301	1	0	1	1	1	0	1	1	1	0	1	0	0	0	8	6	2	27	58
302	1	1	1	1	1	0	1	1	1	1	0	1	1	1	12	2	2	27	58
303	1	1	1	1	1	0	1	1	1	1	1	1	0	1	12	2	1	24	58
304	1	1	1	1	1	1	1	1	1	1	1	0	0	1	12	2	2	38	58
305	1	0	1	1	1	1	1	1	1	1	1	0	1	0	11	3	2	51	59
306	1	0	1	0	1	0	1	1	1	1	0	0	0	0	7	7	2	50	59
307	1	0	1	0	1	0	1	1	1	1	1	1	0	1	10	4	2	54	59
308	1	1	1	1	1	1	1	1	1	1	0	0	0	0	10	4	2	41	60
309	1	1	1	1	1	0	1	1	1	1	0	0	0	0	9	5	2	29	60
310	1	1	1	1	1	1	1	1	1	1	0	0	0	0	10	4	2	29	60
311	1	1	1	1	1	1	1	1	1	1	0	1	0	1	12	2	2	32	61
312	1	0	1	0	1	0	1	1	1	1	0	1	0	1	9	5	2	25	61
313	1	1	1	1	1	0	1	1	1	1	0	0	0	0	9	5	2	29	61
314	1	0	1	1	1	1	1	1	1	1	0	0	0	0	9	5	2	25	61
315	1	0	0	1	0	0	1	1	1	0	1	0	0	0	6	8	2	30	61
316	1	1	1	0	1	1	1	1	1	1	0	0	0	0	9	5	2	28	61
317	1	0	1	0	1	0	0	1	1	1	0	0	0	0	6	8	2	29	61
318	1	0	1	0	1	0	1	1	1	1	0	0	0	0	7	7	2	53	62
319	0	0	1	0	1	1	1	1	1	1	0	0	0	0	7	7	2	47	63
320	1	1	1	0	1	0	1	1	1	1	1	1	0	0	10	4	2	53	63
321	0	0	1	0	1	1	1	1	1	1	0	1	0	0	8	6	2	49	63
322	1	1	1	0	1	0	0	1	1	1	1	1	0	0	9	5	2	48	63
323	1	0	1	1	1	0	1	1	1	1	1	0	0	0	9	5	2	39	63
324	1	0	1	0	1	0	1	1	1	1	1	0	0	0	8	6	2	36	64
325	1	0	1	0	1	0	0	1	1	1	0	1	0	1	8	6	2	26	64
326	1	0	1	0	1	0	0	1	1	1	0	0	0	0	6	8	2	53	64
327	1	1	1	1	1	1	1	1	1	1	1	1	1	1	14	0	2	34	64
328	1	1	1	0	1	1	1	1	1	1	1	1	0	1	12	2	2	36	64
329	1	0	1	1	1	0	1	1	1	1	1	1	0	1	11	3	2	46	65
330	1	0	1	0	1	0	1	1	1	0	1	1	0	1	9	5	2	45	65
331	1	1	1	1	1	1	1	1	1	1	1	1	0	1	13	1	2	26	65
332	1	1	1	1	1	1	1	1	1	0	1	1	1	1	13	1	2	43	65
333	1	0	1	0	1	0	1	1	1	1	1	0	1	0	9	5	2	52	65
334	1	1	1	1	1	1	1	1	1	1	0	0	0	0	10	4	2	27	66
335	1	1	1	0	1	1	1	1	1	1	1	0	0	1	11	3	2	25	66
336	1	0	1	0	1	1	1	1	1	1	0	1	0	1	10	4	2	32	66
337	1	0	1	1	1	0	1	1	1	1	1	0	0	1	10	4	2	51	66
338	1	0	1	1	1	0	1	1	1	1	0	1	0	1	10	4	1	43	67
339	1	0	1	1	1	0	1	1	1	1	0	0	0	0	8	6	2	25	68
340	1	0	1	1	1	1	1	1	1	1	1	0	1	1	12	2	2	35	68
341	1	1	1	0	1	0	1	1	1	1	0	0	0	1	9	5	2	28	68
342	1	1	1	0	1	0	1	1	1	1	1	1	0	0	10	4	2	30	68
343	1	1	0	1	1	0	1	1	1	1	0	0	0	0	8	6	2	55	69
344	1	0	1	0	1	0	0	1	1	0	0	0	0	0	5	9	2	35	70
345	1	0	1	1	1	0	1	1	1	1	1	1	1	1	12	2	2	39	70
346	1	1	1	0	1	0	1	1	1	1	0	0	1	1	10	4	2	45	70
347	1	1	1	1	1	0	1	1	1	0	1	1	0	1	11	3	2	38	70
348	0	1	1	1	1	1	1	1	1	1	1	1	1	1	13	1	2	50	70
349	1	0	1	1	0	0	1	1	1	1	1	0	1	0	9	5	1	27	70
350	1	0	1	1	1	1	1	1	1	1	0	1	0	0	10	4	2	27	70
351	1	1	1	0	1	1	0	1	1	1	1	0	0	0	9	5	2	25	71
352	1	0	1	1	1	0	1	1	1	1	0	0	0	0	8	6	2	38	71
353	1	0	1	1	1	1	1	1	1	1	0	0	0	0	9	5	2	25	71
354	1	1	1	1	1	1	1	1	1	1	0	0	0	0	10	4	2	43	71
355	1	1	1	1	1	1	1	1	1	1	1	0	1	1	13	1	2	42	72
356	1	0	1	1	1	1	1	1	1	1	0	0	0	0	9	5	2	37	72
357	1	1	1	0	1	1	0	1	1	1	0	0	0	0	8	6	1	28	72
358	1	1	1	0	1	0	1	1	1	1	0	1	1	1	11	3	2	48	72
359	1	1	1	1	1	0	1	1	1	1	1	1	0	0	11	3	1	37	72
360	1	1	1	1	1	1	1	1	1	0	1	1	1	1	13	1	2	30	73
361	1	0	1	1	1	0	1	1	1	1	1	1	1	1	12	2	2	35	73
362	1	0	1	1	1	1	1	1	1	1	0	0	0	0	9	5	2	36	73
363	1	1	1	1	1	1	1	1	1	1	1	1	0	1	13	1	2	28	73
364	1	1	1	1	1	1	1	1	1	1	1	1	1	1	14	0	2	25	73
365	1	1	1	1	1	1	1	1	1	1	0	0	0	1	11	3	2	29	73
366	1	1	1	1	1	1	1	1	1	1	0	0	0	1	11	3	2	26	73
367	1	0	1	1	1	1	1	1	1	1	1	0	1	1	12	2	2	44	74
368	1	1	1	1	1	1	1	1	1	1	1	1	1	1	14	0	2	34	74
369	1	1	1	1	1	1	1	1	1	1	1	1	1	1	14	0	2	37	74
370	1	1	1	1	1	0	1	1	1	1	1	1	1	1	13	1	1	27	74
371	1	1	1	1	1	0	1	1	1	1	1	0	1	1	12	2	2	50	74
372	1	0	1	0	1	0	1	1	1	1	1	1	0	1	10	4	2	26	74
373	1	1	1	1	1	1	1	1	1	1	0	0	0	1	11	3	2	30	74
374	1	0	1	0	1	1	1	1	1	1	1	1	0	1	11	3	2	29	75
375	1	1	1	1	1	1	1	1	1	1	1	1	1	1	14	0	2	36	75
376	1	1	1	0	1	0	1	1	1	1	1	1	0	1	11	3	2	31	75
377	1	0	1	1	1	0	1	1	0	1	1	1	1	1	11	3	2	43	75
378	1	0	1	1	1	1	1	1	1	1	1	1	1	1	13	1	2	31	75
379	1	0	1	1	1	1	1	1	1	1	1	0	0	0	10	4	2	31	75
380	1	0	1	1	1	1	1	1	1	1	1	1	1	1	13	1	2	34	75
381	1	0	1	1	1	0	1	1	1	1	1	1	1	1	12	2	2	28	75
382	1	1	1	1	1	1	1	1	1	1	1	0	0	1	12	2	2	33	75
383	1	1	1	1	1	0	1	1	1	1	1	1	1	1	13	1	2	32	76
384	1	0	1	1	1	0	0	1	1	1	1	0	0	0	8	6	2	24	76
385	1	1	1	1	1	1	1	1	1	1	0	0	0	0	10	4	2	45	76
386	1	0	1	1	1	1	1	1	1	1	1	1	0	1	12	2	2	30	76
387	1	1	1	1	1	1	1	1	1	1	1	0	0	0	11	3	2	26	76
388	1	1	1	1	1	1	1	1	1	1	1	0	0	0	11	3	2	24	76
389	1	1	1	1	1	1	1	1	1	1	1	1	1	1	14	0	2	25	76
390	1	1	1	1	1	1	1	1	1	1	1	0	0	1	12	2	2	30	76
391	1	0	1	1	1	0	1	1	1	1	1	1	0	1	11	3	2	30	76
392	1	1	1	1	1	1	1	1	1	1	0	0	0	0	10	4	2	27	76
393	1	1	1	1	1	0	1	1	1	1	1	1	1	1	13	1	2	31	77
394	1	0	1	0	1	1	1	1	1	0	0	0	0	0	7	7	2	54	77
395	1	0	1	1	1	0	1	1	1	1	1	1	1	1	12	2	2	25	78
396	1	1	1	1	1	0	1	1	1	1	0	0	0	0	9	5	2	24	78
397	1	1	1	1	1	1	0	1	1	1	1	1	1	1	13	1	2	28	78
398	1	1	1	1	0	1	1	1	1	1	1	1	1	0	12	2	2	26	78
399	1	0	1	1	1	1	1	1	1	1	1	1	1	1	13	1	2	30	78
400	1	1	1	1	1	1	1	0	1	0	1	1	1	1	12	2	2	26	78
401	1	1	1	0	1	0	1	1	1	1	0	0	0	0	8	6	2	26	78
402	1	1	1	1	1	1	1	1	1	0	0	0	1	1	11	3	2	28	79
403	1	0	1	1	1	0	1	1	1	0	0	0	0	1	8	6	2	28	79
404	1	0	1	1	1	0	1	1	1	0	1	0	0	1	9	5	2	28	79
405	1	0	1	1	1	1	1	1	1	0	1	1	1	1	12	2	2	28	79
406	1	1	1	1	1	1	1	1	1	1	1	0	1	1	13	1	2	27	79
407	1	0	1	1	0	0	1	1	1	1	1	1	0	0	9	5	2	32	79
408	1	1	1	1	1	0	1	1	1	1	1	1	1	1	13	1	2	25	80
409	1	0	0	1	0	1	1	1	1	1	1	1	1	1	11	3	1	28	80
410	1	1	1	1	1	1	0	1	1	1	1	1	1	1	13	1	2	29	80
411	1	0	1	1	1	1	1	1	1	1	1	1	1	0	12	2	2	26	81
412	1	1	1	1	1	1	1	1	1	1	1	1	0	1	13	1	2	27	81
413	1	1	1	1	1	1	1	1	1	1	0	1	0	0	11	3	2	37	81
414	1	0	1	0	1	1	1	1	1	1	1	1	0	0	10	4	2	26	81
415	1	1	1	1	1	1	1	1	1	1	1	0	1	1	13	1	2	36	82
416	1	0	1	1	1	1	1	1	1	1	1	1	1	1	13	1	2	26	82
417	1	1	1	1	1	1	1	1	1	1	1	0	0	1	12	2	2	51	82
418	1	0	1	1	1	0	1	1	1	1	1	1	1	1	12	2	2	35	83
419	1	0	1	1	0	0	1	1	1	1	1	1	1	0	10	4	2	40	83
420	1	1	1	1	1	1	1	1	1	1	1	0	0	0	11	3	2	41	83
421	1	0	1	1	0	1	1	1	1	1	1	1	1	1	12	2	2	34	83
422	1	0	1	1	1	1	1	1	1	1	1	1	1	1	13	1	2	30	83
423	1	0	1	1	0	1	1	1	1	1	0	0	0	0	8	6	1	40	83
424	1	0	1	0	1	0	1	1	1	1	0	0	1	1	9	5	2	32	84
425	1	1	1	1	1	1	1	1	1	1	1	0	1	0	12	2	2	44	84
426	1	0	1	0	1	1	1	1	1	0	1	0	0	1	9	5	2	29	84
427	1	0	1	1	1	1	1	1	1	1	1	1	1	1	13	1	2	36	84
428	1	1	1	0	1	1	0	1	1	1	0	0	0	0	8	6	2	32	84
429	1	0	1	0	1	1	1	1	1	1	0	0	0	0	8	6	2	32	84
430	1	0	1	0	1	0	0	1	1	1	0	0	0	0	6	8	2	25	84
431	1	1	1	1	1	1	1	1	1	1	1	0	0	0	11	3	2	26	84
432	1	0	1	1	1	1	0	1	1	1	0	1	1	1	11	3	2	28	85
433	1	1	1	0	1	0	1	1	1	1	1	1	1	1	12	2	2	30	85
434	1	1	1	0	1	0	1	1	1	1	0	0	0	0	8	6	2	28	85
435	1	0	1	1	1	1	1	1	1	1	1	1	0	1	12	2	2	32	85
436	1	1	1	1	1	1	1	1	1	1	1	1	0	1	13	1	2	33	85
437	1	0	1	0	1	1	0	1	1	1	1	1	1	1	11	3	2	27	85
438	1	0	1	1	1	0	1	1	1	1	1	1	1	1	12	2	2	28	86
439	1	0	1	0	1	1	1	1	1	1	0	0	0	1	9	5	2	33	86
440	0	0	1	1	0	1	1	1	1	1	0	0	1	0	8	6	2	56	86
441	1	0	1	1	1	1	1	1	1	1	1	1	1	1	13	1	2	27	87
442	1	1	1	1	1	0	1	1	1	1	1	0	1	0	11	3	2	30	87
443	1	0	1	1	1	1	1	1	1	1	0	1	1	1	12	2	2	26	87
444	1	1	1	1	1	1	1	1	1	1	1	1	0	1	13	1	2	26	87
445	1	1	1	1	1	1	1	1	1	1	1	1	0	0	12	2	2	25	87
446	1	0	1	0	1	1	1	1	1	1	1	1	0	0	10	4	1	27	87
447	1	0	1	1	1	1	1	1	1	1	1	1	0	1	12	2	2	36	87
448	1	1	1	1	1	0	1	1	1	1	1	1	0	1	12	2	2	26	87
449	1	1	1	1	1	1	1	1	1	1	1	1	0	1	13	1	2	27	87
450	1	1	1	1	0	1	1	1	1	1	1	1	1	0	12	2	2	31	87

## Sheet: unit
code2	unit_univ	unit_pub	unit_level	nb_births
1	2	1	1	380
2	2	1	2	1612.5
3	2	1	2	964.333
4	1	1	3	2900
5	1	1	2	3481.25
6	2	2	1	1412.5
7	2	1	2	1150
8	2	1	2	2000
9	2	2	1	806
10	2	1	3	2763
11	2	2	2	1760
12	2	2	1	1500
13	2	2	2	3200
14	2	2	1	1100
15	2	1	2	2054.29
16	2	2	2	2100
17	2	1	1	958.6
18	2	1	2	1632.4
19	2	1	1	642.5
20	2	2	2	2022.22
21	2	1	3	3955.7
22	2	1	1	870.714
23	2	1	1	645
24	2	1	1	868
25	2	1	2	1286.67
26	1	1	3	2299
27	2	2	1	1316.67
28	2	1	2	1864.29
29	2	1	1	800
30	2	1	2	1411.2
31	2	1	2	1300
32	1	1	3	2963.13
33	2	2	1	1915
34	2	1	2	1603
35	1	1	3	2360
36	2	1	2	1675
37	2	2	1	600
38	2	1	1	640.6
39	2	2	1	1100
40	1	1	3	3064.62
41	2	2	1	700
42	2	1	2	1003
43	2	2	1	1733.33
44	2	2	2	3114.29
45	2	2	1	1362.5
46	2	1	3	1722.22
47	2	1	2	600
48	2	1	2	609.167
49	2	1	1	434
50	1	1	3	2678
51	2	1	1	488.8
52	2	1	1	690
53	2	1	1	421
54	1	1	3	3167.5
55	2	1	2	1200
56	2	1	1	480
57	2	1	3	2000
58	2	1	2	1285.71
59	2	2	1	756.667
60	2	1	2	1000
61	2	1	1	644.286
62	2	1	1	594.5
63	2	1	1	950
64	2	1	1	423.4
65	2	1	1	679
66	2	1	1	442.5
67	2	1	2	900
68	1	1	2	2600
69	2	1	2	1200
70	2	1	2	617.571
71	2	1	2	905
72	1	1	3	3400
73	1	1	3	4685.71
74	2	1	2	2171.43
75	2	1	2	2450
76	2	1	2	1390
77	2	2	1	902.333
78	2	1	3	3019.29
79	2	2	2	2966.67
80	2	1	3	4000
81	2	2	1	1675
82	1	1	2	2500
83	1	1	2	2216.67
84	1	1	3	3018.75
85	2	1	1	1312
86	2	2	1	466.667
87	2	2	2	2663.64

## Sheet: coding
id	id midwife
crit_1	No misoprostol (Prostaglandine E1 analogue) in each step
crit_2	First line uterotonic: oxytocin in step 1
crit_3	No surgical treatment in steps 1 or 2
crit_4	manual placental delivery, manual examination of the uterine cavity in step 1
crit_5	No selective arterial embolization in steps 1 or 2
crit_6	Uterine massage in steps 1 or 2
crit_7	Cervical examination with speculum in steps 1 or 2
crit_8	No intrauterine tamponade in step 1
crit_9	No torsion of the cervix in step 1
crit_10	Alert other members of the team in steps 1 or 2
crit_11	venipuncturewith blood count, hemostasis in steps 1 or 2
crit_12	Resuscitation measure in steps 1 or 2
crit_13	Second line uterotonic: Sulprostone (Prostaglandine E2 analogue) in step 2
crit_14	Surgical treatment, selective arterial embolization and/or intrauterine tamponade in step 3
nbok	Number criteria ok
nberrors	number of errors
sex	midwife sex (0: male / 1: female)
age	midwife age (year)
code2	id unit
unit_univ	university status of the unit (1: univeristy / 2: non university)
unit_pub	public status of the unit (1: public / 2: private)
unit_level	level of care of the unit (1/2/3)
nb_births	number of births in the unit per year
